1 **Transcranial electric stimulation modulates firing rate at clinically relevant intensities**

2

3 **Authors:** Forouzan Farahani<sup>1</sup>, Niranjan Khadka<sup>1</sup>, Lucas C. Parra<sup>1</sup>, Marom Bikson<sup>1</sup> and Mihály  
4 Vöröslakos\*<sup>2</sup>

5

6 <sup>1</sup>Department of Biomedical Engineering, The City College of New York, New York, NY, USA

7 <sup>2</sup>Neuroscience Institute and Department of Neurology, NYU Grossman School of Medicine, New  
8 York University, New York, NY, USA

9 \*Correspondence: [mihaly.voroslakos@nyulangone.org](mailto:mihaly.voroslakos@nyulangone.org)

10

11 **Abstract**

12 Notwithstanding advances with low-intensity transcranial electrical stimulation (TES), there  
13 remain questions about the efficacy of clinically realistic electric fields on neuronal function. We  
14 used Neuropixels 2.0 probe with 384 channels in an in-vivo rat model of TES to detect effects of  
15 weak fields on neuronal firing rate. High-density field mapping and computational models verified  
16 field intensity (1 V/m in hippocampus per 50  $\mu$ A of applied skull currents). We demonstrate that  
17 electric fields below 0.5 V/m acutely modulate firing rate in 5% of neurons recorded in the  
18 hippocampus. At these intensities, average firing rate effects increased monotonically with electric  
19 field intensity at a rate of 7 % per V/m. For the majority of excitatory neurons, firing increased for  
20 cathodal stimulation and diminished for anodal stimulation. While more diverse, the response of  
21 inhibitory neurons followed a similar pattern on average, likely as a result of excitatory drive. Our  
22 results indicate that responses to TES at clinically relevant intensities are driven by a fraction of  
23 high-responder excitatory neurons, with polarity-specific effects. We conclude that transcranial  
24 electric stimulation is an effective neuromodulator at clinically realistic intensities.

## 25 Introduction

26 The effects of transcranial electric stimulation on neural activity in the brain have been known  
27 since the 1960<sup>1-3</sup>. The acute effects on neuronal firing rate are particularly well established.  
28 Namely, the electric fields generated within the brain by transcranial current stimulation can  
29 incrementally polarize cell membranes<sup>4</sup> and thus modulate ongoing cell firing<sup>5,6</sup>. The effect acts at  
30 the time scale of the neuronal membrane (~30ms) and thus is relevant for direct current (DC) and  
31 most effective for alternating currents (AC) of 30 Hz or less<sup>7,8</sup>. This acute neuromodulatory effect  
32 can be predicted from the orientation and intensity of local electric fields<sup>9</sup>. These cellular  
33 mechanisms established with in vitro animal experiments, also point to network effects<sup>10,11</sup>, which  
34 can be properly studied only in the intact brain.

35 However, despite numerous in-vivo animal studies in the intervening decades<sup>12-24</sup>, there is still a  
36 lack of clarity as to whether the effects observed are clinically relevant, for one simple reason: in  
37 vivo animal experiments have not adequately characterized electric field magnitudes in the brain.  
38 In particular, a significant gap has emerged<sup>25</sup> between electric fields measured in vivo in the human  
39 brain, which are at or below 0.5 V/m<sup>15,26,27</sup> and field intensities used for in vitro animal  
40 experiments, which are mostly at or above 5 V/m<sup>28</sup>. Thus, it is difficult to interpret and link results  
41 from in vivo animal experiments to cellular effects observed in vitro. Nor is it clear that the in vivo  
42 animal experiments have any relevance to the behavioral effects observed in human clinical  
43 studies.

44 To close this gap, we measured here for the first-time electric fields magnitude and their effects  
45 on neuronal firing rate in vivo in rats and established calibrated computational models of current  
46 flow. To do so, we first calibrated our recording equipment on a phantom, and performed in vivo  
47 field measurements in cortex and hippocampus in a rodent TES model. Then, using high-channel  
48 probes (Neuropixels2.0)<sup>29</sup> we analyzed firing rate of individual putative pyramidal and  
49 interneurons in response to short (2s) DC stimulation. We demonstrate here acute modulation of  
50 neuronal firing rate with 0.5 V/m electric fields. Polarity-specific sensitivity at such low fields  
51 were governed by a small population of excitatory neurons. Prior studies have shown that changes  
52 in a small number of neurons can lead to behavioral effects<sup>30,31</sup>. Thus, clinically relevant TES  
53 intensities produce neuronal firing changes sufficient, in principle, to impact human brain function.

## 55 Results

### 56 Measurement and modeling of TES-induced electric fields in motor cortex of rats

57 To characterize the effects of TES it is necessary to properly calibrate electric field  
58 measurements, which is the main determining factor for acute effects on neuronal function<sup>32</sup>. After  
59 characterizing our stimulation and recording system using agar phantom (**Suppl. Fig. 1**), we  
60 measured field intensity intracranially and built an anatomically detailed computational model of  
61 our electrode montage. In our experimental setup we applied sinusoidal alternating current (10,

62 100 and 1000 Hz) in two anesthetized rats. To electrically isolate the animal from the metallic  
63 stereotactic frame, we 3D-printed a non-conducting nose holder and ear bars (**Fig. 1a and Suppl.**  
64 **Fig. 2**, Clear V4 resin, Formlabs) and placed the animal on a non-conducting surface. A platinum  
65 electrode was affixed to the skull over the forelimb motor cortex (1.5 mm anterior to bregma and  
66 3 mm lateral from midline) within a chamber loaded with conductive gel. The pocket to hold gel  
67 and TES electrode was made of dental cement (**Fig. 1b**, 3 by 3 mm, GC Unifast). The return  
68 electrode was a platinum mesh (10 by 10 mm) implanted in the chest wall<sup>19</sup> (**Fig. 1a**). This  
69 electrode montage provided electro-chemical stability and free range of movements in behaving  
70 rats. To measure the electric field generated by transcranial stimulation, we used a multi-channel,  
71 custom-built recording electrode matrix (n = 4 channels in total, 2 channels per shank, 1 mm  
72 distance between shanks and channels, **Fig. 1b and Suppl. Fig. 3**). After a craniotomy through the  
73 parietal bone, we inserted the electrode matrix into the motor cortex from the lateral side and sealed  
74 it with non-conductive silicon (Suppl. Fig. 2b, Kwik Cast silicone, Kwik-Cast). We found that  
75 electric field magnitude increased linearly with stimulation current, with similar slope at the three  
76 stimulation frequencies (Fig. 2c, slope: 15.0 V/m/ $\mu$ A). In a second animal we measured fields of  
77 twice this magnitude (not shown, slope 30.0 V/m).

78 To build the computation model, we used a high-resolution (0.1 mm) MRI (magnetic resonance  
79 image) of a healthy rat, which had been segmented into tissue masks and assigned each a  
80 conductivity value (skull – 0.02 S/m, cerebrospinal fluid – 1.7 S/m, gray matter – 0.276 S/m, white  
81 matter – 0.126 S/m, hippocampus – 0.126 S/m) based on prior work<sup>37,38</sup>. We generated a  
82 Volumetric Finite Element method (FEM) model using Simpleware (Synopsys Inc., CA). The  
83 resulting volumetric meshes were later imported into COMSOL Multiphysics 5.5 (COMSOL Inc.,  
84 MA, USA) to generate FEM models and solved for electric fields under steady-state assumption.  
85 We simulated our experimental setup by placing electrodes in the model on the skull above the  
86 motor cortex (anode, 3x3mm) and intercostal muscles (cathode, 8 by 8 mm) (**Fig 1d**). We applied  
87 constant current density through one electrode (anode: 150  $\mu$ A) while grounding the other  
88 electrode (cathode). The external boundaries were electrically insulated ( $J_n = 0$ ). Corresponding  
89 voltage and electric fields were quantified from the simulations. At the motor cortex location  
90 corresponding to the in vivo field recordings (Fig. 2e, circle) the model estimates an electric field  
91 of 2.26 V/m (**Fig. 1e**). This corresponds to 15.07 V/m per mA and is within the range measured  
92 in-vivo. Although it should be noted that there is a strong gradient as one moves radially (**Fig. 1f**)  
93 - moving just 1mm closer to the stimulating electrode the electric field per applied current doubles  
94 to 30 V/m per mA - and the recording matrix has 1 mm side length. The model indicated that only  
95 one hemisphere was affected by TES using our electrode montage (**Fig. 1e**).

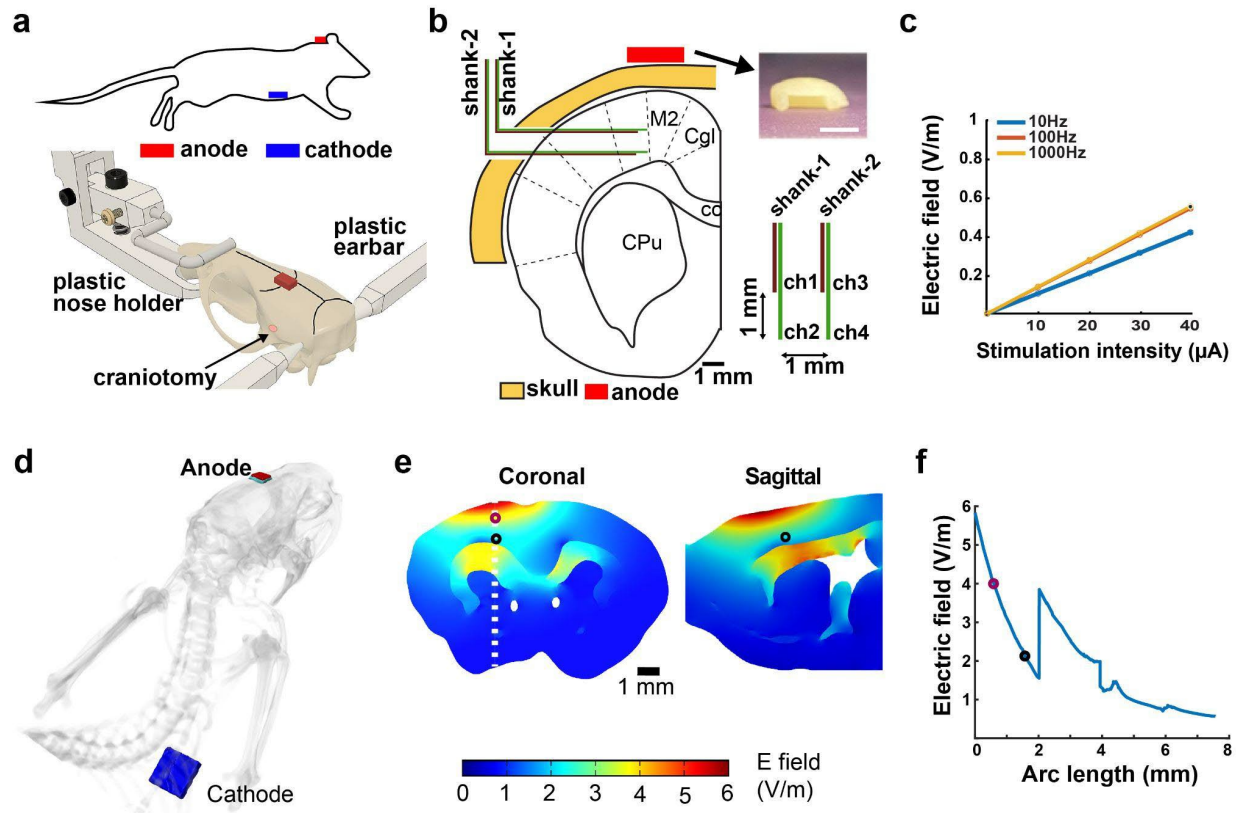

96

97 **Figure 1. Measurement and modeling of TES-induced electric field in motor cortex.** a) Electric field  
 98 measurement in the motor cortex of rats. Top: anode is affixed to the skull above the primary motor cortex  
 99 (3 by 3 mm platinum plate), cathode is implanted inside the chest wall (10 by 10 mm platinum mesh).  
 100 Bottom: 3D-printed nose holders and ear bars are used to isolate the animal from the metallic components  
 101 of the stereotactic frame during measurements. The rat skull is shown inside the nose holder with an  
 102 attached anode (red rectangle) and craniotomy in the parietal bone. b) Schematic of the position of recording  
 103 electrodes in the motor cortex. Note that electrodes were inserted from the lateral side of the skull through  
 104 the temporal craniotomy. Top, right: Customized holder for the stimulation electrode (scale bar is 3 mm).  
 105 Bottom, right: schematic of the custom-built, 2-shank, 4-channel tungsten recording matrix. Each shank  
 106 had 2 recording channels (both ch1 and ch2 and shank-1 and shank-2 are separated by 1 mm). c) Increasing  
 107 stimulation intensity induces an increasing electric field in the motor cortex. d) Anatomically accurate  
 108 FEM model including anode (red) and gel (green) placed on the skull and cathode implanted in the chest  
 109 (blue). e) Distribution of field magnitude estimated with the current flow model at 150  $\mu\text{A}$  current. f) Field  
 110 amplitude as a function of distance from the cortical surface moving in radial direction (Arc length). The  
 111 discontinuity is due to a discontinuity in conductivity (white matter of corpus colosseum has lower  
 112 conductivity than gray matter, 0.126 S/m vs 0.276 S/m)

### 113 Measurement and modeling of TES-induced electric fields in hippocampus of rats

114 The field measurements and model established that 100  $\mu\text{A}$  stimulation can induce 1.5-3 V/m  
 115 fields in motor areas. The exact field magnitude strongly depends on the recording location and  
 116 thus, it has to be measured in the precise region of interest. We were interested in neural responses  
 117 in the hippocampus, and so we decided to measure fields again with the same electrodes we will  
 118 use for neural activity. We implanted Neuropixels (NP) 2.0 probes<sup>29</sup> in the intermediate CA2

119 region of freely moving rats (**Fig. 2a**,  $n = 2$  rats, 4.8 mm posterior to bregma and 4.6 mm lateral  
120 to midline, angled at 10 degrees). We applied electrical current through two skull electrodes (2  
121 mm by 2mm platinum plates), but this time affixed to the temporal bone bilaterally (**Fig. 2a**). We  
122 took advantage of the 5120 contacts available on the NP 2.0 probe, to select 384 channels for  
123 recording from each shank. We chose a single shank, linear configuration spanning 5760  $\mu\text{m}$  (15  
124  $\mu\text{m}$  separation per channel) to record electric potential during sinusoidal TES (100 Hz,  $n = 500$   
125 cycles, at 10, 20, and 30  $\mu\text{A}$  intensity) sequentially from each of the 4 implanted shanks. (**Fig. 2b**).  
126 As expected, we recorded higher voltages on the most lateral shank (**Fig. 2b**, shank-4 was closest  
127 to the stimulation electrode, each shank is separated by 250  $\mu\text{m}$ ). Additionally, we recorded higher  
128 voltage values following the curvature of the brain surface which likely reflects shunting caused  
129 by cerebrospinal fluid in the meningeal space<sup>27,39,40</sup>. To measure the electric fields in the  
130 hippocampus, we first localized the cellular layer of CA2 using electrophysiological markers (**Fig.**  
131 **2c**). We detected sharp wave ripples in the local field potential (LFP) signal and calculated the  
132 ripple triggered average signal across 48 channels (**Fig. 2c, left**; 12-channel steps corresponding  
133 to 180  $\mu\text{m}$  inter-site distance) and we identified the channel with maximum ripple power (**Fig 2c,**  
134 **left**; highlighted channels in red). We determined the position of individual neuronal somata using  
135 spike sorting and spike-amplitude trilateration (**Fig. 2c, right**; <sup>41,42</sup>). To calculate the hippocampal  
136 electric field, we used  $\pm 32$  channels around the center of these soma locations (**Fig. 2d**). Similar  
137 to the motor cortex, we found that increasing stimulation intensity (10, 20 and 30  $\mu\text{A}$ ) induced  
138 increasing intracerebral electric fields ( $0.1 \pm 0.01$ ,  $0.28 \pm 0.03$  and  $0.56 \pm 0.11$  V/m, mean  $\pm$  SEM,  
139  $n = 3$  sessions from 2 rats,  $R = 0.76$ ,  $p < 0.001$ ). This corresponds to 10, 14 and 18.7 V/m per mA  
140 and thus somewhat less than the cortical measures, as expected. To simulate our experimental  
141 setup, we placed electrodes over the parietal bone (**Fig 2f**). We applied 100  $\mu\text{A}$  current through  
142 one electrode (anode) while grounding the other electrode (cathode). The model predicted an  
143 electric field of 2.1 V/m in white matter and 1.2 V/m in gray matter in the hippocampus (**Fig. 2g,**  
144 **h**). This corresponds to 12-21 V/m per mA of applied current and is consistent with what we  
145 observed in the experimental recording above. As expected, the magnitude of the electric field  
146 dropped with distance from the cortex but increased at the boundary of white-gray matter transition  
147 (**Fig. 2g, h**).

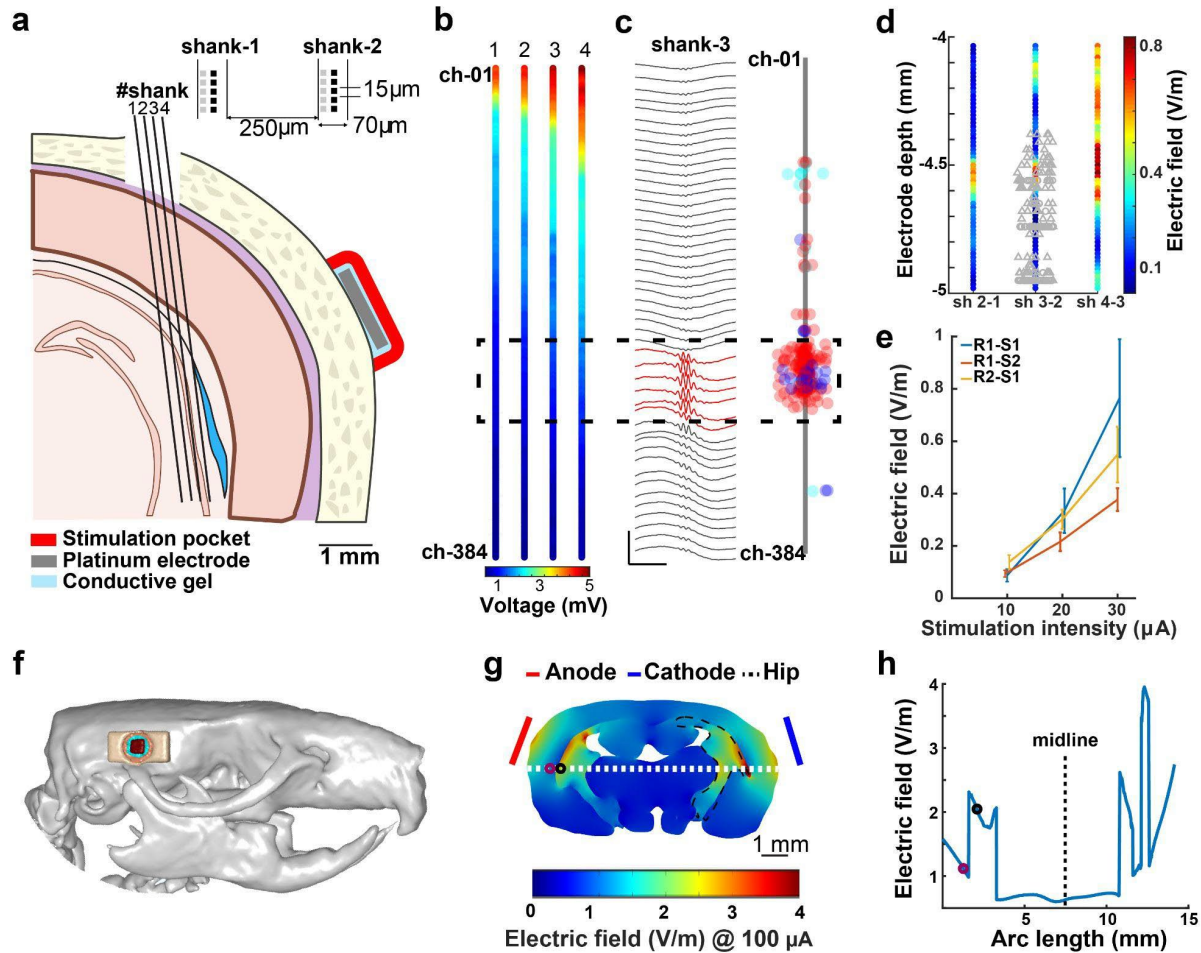

148

149 **Figure 2. Measurement and modeling of TES-induced electric field in hippocampus.** a) Electric field  
 150 measurement in the hippocampus of freely moving rats. Anode and cathode are placed on the temporal  
 151 bone (2 by 2 mm platinum plate). Multi-shank, multi-site silicon probe is used to measure the electric field  
 152 (probe is inserted at 10 degrees), details of the shanks are shown on the right. b) TES-induced (30 µA, 100  
 153 Hz) peak-to-peak voltage changes measured in 4 shanks. Colors indicate the peak-to-peak average  
 154 measured on each channel (n = 500 repetitions, n = 384 channels/shank, recorded sequentially from n = 4  
 155 shanks). Note the increasing voltage values closer to the stimulation electrode (shank-4). c) Localizing  
 156 cellular layer of hippocampus using electrophysiological markers. Left: ripple triggered average LFP traces  
 157 recorded on shank-3 linear configuration (n = 48 channels, every 8<sup>th</sup> channel is shown). Red channels show  
 158 the location of the maximum ripple amplitude. Right: schematic of shank-3 is shown with the putative  
 159 location of recorded neuron somata (n = 181 putative pyramidal cells, 81 narrow interneurons and 2 wide  
 160 interneurons, red, blue, and cyan circles, respectively). Single units were clustered in the cellular layers of  
 161 the hippocampus (ch-01 represents brain surface). d) TES-induced electric fields recorded in the cellular  
 162 layer of the hippocampus (black dashed rectangle, n = 64 channels per shank). The location of recorded  
 163 neuron somas is overlaid in gray on shank 3-2. e) Increasing stimulation intensity (10, 20 and 30 µA)  
 164 induces increasing intracerebral electric field (0.1, 0.28 and 0.56 V/m, R = 0.75, p < 0.001). f) Electrode  
 165 montage in the rat model. g) Modeling results of TES-induced electric fields in the coronal plane (4.8 mm  
 166 posterior from bregma) at 100µA. h) Electric field intensity along the white dotted line in panel g. The  
 167 discontinuity in electric field is due to discontinuity in conductance between white and gray matter (see  
 168 **Suppl. Fig. 4**)

169

## 170 Intensity and polarity dependent effects of single unit activity induced by TES

171 Single-unit action potentials – which are not always available in animals and are rarely possible  
172 in humans – are the most direct measurement of neural activity. We quantified how different TES  
173 intensities (25 to 400  $\mu\text{A}$ ) can affect the spiking activity of neurons in the hippocampus. These  
174 currents generate fields in the range of 0.375 V/m to 6 V/m assuming the observed 15 V/m per  
175 mA applied. We performed these measurements using the same rats where we measured electric  
176 fields and using the same recording and stimulation electrodes. TES was applied for 4 seconds and  
177 repeated 400 times with 4 seconds intervals of no stimulation. Single-unit activity was recorded  
178 from the CA2 region (**Fig. 3a, Suppl. Fig. 5**) in 4 rats freely moving in their home cage, and one  
179 anesthetized rat (**Suppl. Table 1**)<sup>29,43</sup>. Depending on the polarity of the stimulation, putative single  
180 units either increased (cathodal TES) or decreased (anodal TES) their spiking activity (**Fig. 3b**;  
181 slope: -3.75% per V/m,  $R = -0.33$ ,  $P < 0.001$ ,  $n = 510$  neurons). Mean percent change in firing rate  
182 (FR) of neurons was  $24.57 \pm 1.53$  (-300  $\mu\text{A}$ ),  $27.65 \pm 1.51$  (-200  $\mu\text{A}$ ),  $4.83 \pm 1.61$  (-100  $\mu\text{A}$ ),  $7.3$   
183  $\pm 2.03$  (-50  $\mu\text{A}$ ),  $6.18 \pm 1.87$  (-25  $\mu\text{A}$ ),  $-2.5 \pm 1.92$  (25  $\mu\text{A}$ ),  $-3 \pm 2.08$  (50  $\mu\text{A}$ ),  $-6.64 \pm 1.74$  (100  
184  $\mu\text{A}$ ),  $-7.69 \pm 1.94$  (200  $\mu\text{A}$ ), and  $-19.82 \pm 1.82$  (300  $\mu\text{A}$ ; **Fig. 3b**, mean  $\pm$  SEM,  $n = 510$  neurons in  
185 4 rats and  $n = 394$  neurons in 3 rats). We have tested higher intensities in a urethane anesthetized  
186 rat and found that the effects did not saturate. Specifically, cathodal stimulation increased the  
187 spiking rate by  $37.22 \pm 5.13\%$  (-400  $\mu\text{A}$ ), while anodal TES further decreased the activity of  
188 neurons by  $-25.4 \pm 4.51\%$  (400  $\mu\text{A}$ ,  $n = 68$  neurons, **Suppl. Fig. 6**). To confirm the opposing effect  
189 on spiking activity of hippocampal cells underneath the anode and cathode, we recorded from both  
190 hippocampi simultaneously using two, 32-channel silicon probes in an anesthetized rat<sup>15</sup>. Our  
191 modeling results anticipated that the electric field's magnitude would be comparable in both  
192 hemispheres, but with opposing orientation relative to the orientation of pyramidal neurons.  
193 Neurons under the cathode were excited (**Fig. 3c**, blue neuron), whereas those under the anode  
194 were inhibited during TES (**Fig. 3c**, purple neuron,  $n = 400$  trials, 500 ms stimulation followed by  
195 1 s stimulation free epochs). This is the expected direction of effects given that hippocampal  
196 pyramidal neurons have the opposite orientation to cortical-surface neurons and therefore radially  
197 outward currents are soma-depolarizing for hippocampal neurons<sup>4,44</sup>.

198 In the freely behaving animals, single units were classified into putative pyramidal cell and  
199 interneuron types based on waveform and spike train characteristics (**Figure 3d**, top; see Methods).  
200 Stimulation exerted clear and predictable effects on the spiking rate of putative pyramidal cells  
201 (**Fig. 3d**, left;  $R = -0.34$ ,  $p < 0.001$ ,  $n = 359$  putative pyramidal cells) and putative interneurons  
202 (**Fig. 3d**, right;  $R = -0.3$ ,  $p < 0.001$ ,  $n = 151$  putative interneurons). A linear fit is better than a  
203 sigmoid fit to these dose-response curves and we find slopes of  $\Delta\text{FR} = 4.6\%$  per V/m, and  $\Delta\text{FR} =$   
204  $3\%$  per V/m for putative pyramidal and interneurons, respectively. This difference was more  
205 pronounced at lower intensities between 100 and -100  $\mu\text{A}$  ( $\sim 1.5$  V/m). In this stimulation regime,  
206 putative pyramidal cells exhibited a 9.6% increase in spiking activity during cathodal TES, while  
207 putative interneurons showed a slight decrease of -0.7%. For anodal stimulation at the same  
208 intensities, putative pyramidal cells showed a decrease of -4.3%, whereas putative interneurons  
209 showed a slightly smaller decrease of -2.8% change in their firing rate. Further analysis of cell

210 type specific effects revealed that a subset of neurons (13 out of 578 cells) responded to TES in a  
 211 manner opposite to the overall average response of the population (**Fig. 3e**). Comparing the  
 212 number of significantly modulated neurons across TES stimulation intensities, we found that  
 213 higher intensities affected the spiking activity of more neurons regardless of the polarity of  
 214 stimulation (**Fig. 3f**, mean  $\pm$  SEM,  $n = 4$  rats), and even very low intensity TES ( $25\mu\text{A} \sim 0.375\text{V/m}$ )  
 215 had a significant effect on the activity of a handful of neurons (3.36 and 5.01% of neurons for anodal  
 216 and cathodal TES, respectively).

217 The usual assumption is that pyramidal neurons are preferentially affected by TES due to their  
 218 morphology<sup>5</sup>. However, the TES effects observed here appear to be rather complex, compared to  
 219 what is expected from isolated stimulation of pyramidal neurons. To demonstrate this, we used  
 220 transgenic mice where we can selectively stimulate excitatory cells in the CA1 region using brief  
 221 pulses of blue light (405 nm, 100 ms,  $n = 100$  trials in a head-fixed, awake transgenic mouse  
 222 expressing channelrhodopsin-2 (ChR2) exclusively in CamKII expressing excitatory cells, **Suppl.**  
 223 **Fig. 7**)<sup>45</sup>. We observed prominent firing of action potentials both in putative pyramidal cells and  
 224 in putative interneurons, likely as a result of monosynaptic excitatory drive from the stimulated  
 225 pyramidal neurons (**Suppl. Fig. 7d**,  $\Delta\text{FR} = 95.46$  and  $95.24\%$  for putative pyramidal cells and  
 226 interneurons, respectively, median,  $p = 0.85$ , Wilcoxon rank sum test).

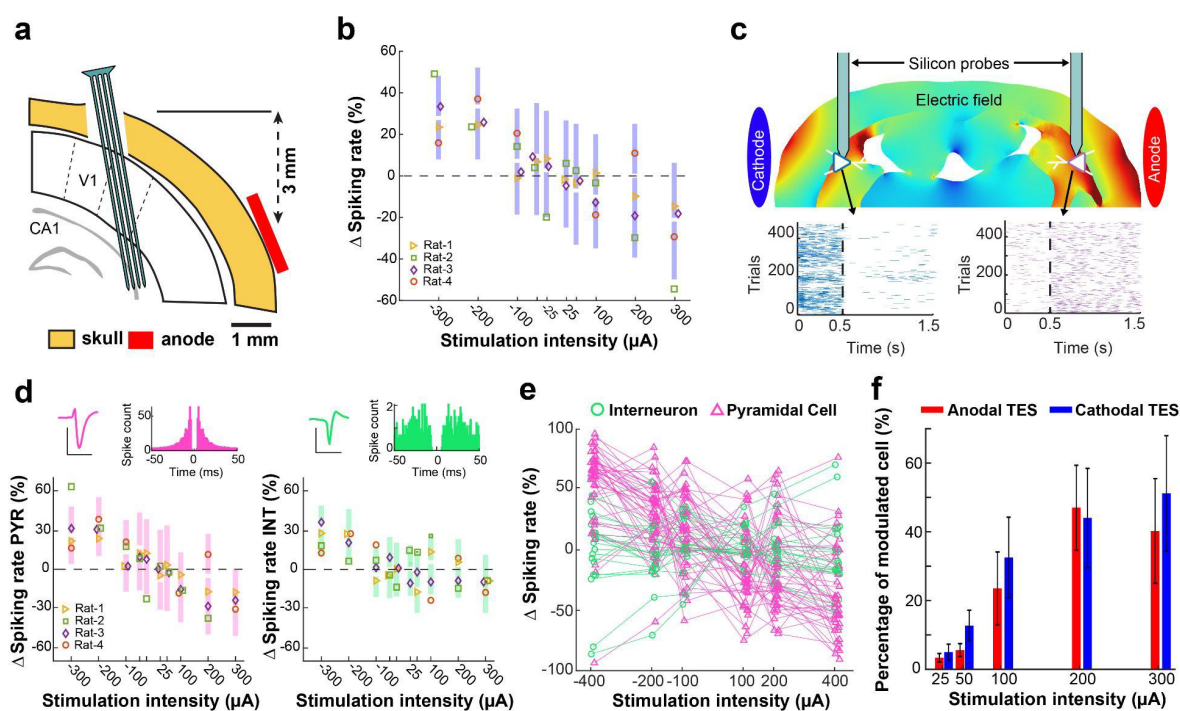

227  
 228 **Figure 3. Electric field dependent change of firing rate of hippocampal neurons.** a) Schematic of  
 229 experimental setup. Multi-shank, multi-site silicon probe is used to measure neuronal activity in the  
 230 intermediate CA2. b) TES induced a polarity and intensity dependent modulation of neuronal firing in the  
 231 hippocampus ( $R = -0.33$ ,  $P < 0.001$ ,  $n = 510$  neurons in 4 rats). c) Response of two putative pyramidal cells  
 232 recorded from both hippocampi simultaneously using two 32-channel silicon probes. Blue and purple  
 233 triangle shows the location of the cells' somata overlaid on the electric field model. The neuron closer to



234 the cathode (blue neuron) was excited by the stimulation as shown by the peristimulus time histogram. The  
235 neuron closer to the anode showed an opposite response (purple neuron). **d)** Recorded neurons are classified  
236 into putative excitatory (top, left) and putative inhibitory neurons (top, right) based on their waveform and  
237 autocorrelation histogram. The scale bar is 0.1 mV and 1 ms. Bottom: TES influenced the spiking rate of  
238 both putative pyramidal cells (bottom, left,  $R = -0.34$ ,  $p < 0.001$ ,  $n = 359$  neurons in 4 rats) and putative  
239 interneurons (bottom, right,  $R = -0.3$ ,  $p < 0.001$ ,  $n = 151$  neurons in 4 rats). **e)** Some neurons were modulated  
240 in the opposite direction as the average response of the hippocampus. Note the three cells that were inhibited  
241 by cathodal and excited by anodal TES (example session from one rat). **f)** Change in percentage of  
242 significantly modulated neurons (Wilcoxon signed rank test  $p < 0.05$ ) by cathodal (blue) and anodal (red)  
243 stimulation (change in spiking activity is measured relative to the 3-second stimulation free period between  
244 3-second stimulation epochs). Note, the number of modulated cells increased with intensity but were similar  
245 across TES polarities (bar graphs show the mean, error bars represent the SEM,  $n = 4$  rats).

246

## 247 Discussion

248 First, we calibrated the recording equipment with an in vitro phantom. We also built a  
249 computational current-flow model for the rat based on high resolution MRI. This model was  
250 calibrated by measuring voltage changes in the motor cortex and hippocampus in anesthetized and  
251 freely moving rats during sinusoidal TES. We found that 100  $\mu\text{A}$  currents induced 1.5-3 V/m in  
252 motor regions and 1.0-2.0 V/m in the hippocampus. Taking advantage of the 5120 contacts  
253 available on Neuropixels2.0 probes, we measured the electric fields using 1536 channels in the  
254 hippocampus. As expected from the model, electric fields decrease with distance from the  
255 stimulation electrodes. Using large-scale electrophysiology in freely moving rats, we found that  
256 neuronal firing was modulated by TES with a linear dose-response in the range of -300 $\mu\text{A}$  to +300  
257  $\mu\text{A}$ . Firing rate increased by about 10% per 100  $\mu\text{A}$  (in **Fig. 4d**), and given an average field of  
258 approximately 1.5 V/m per 100  $\mu\text{A}$  (**Fig. 3e**) this is an approximate 7% effect per V/m. This is at  
259 the upper limit of effects reported in previous in-vitro literature.<sup>28</sup>

260 Local electric field intensity and orientation at the targeted neurons is a key factor affecting the  
261 efficacy of neuromodulation<sup>4,46</sup>. Translation of preclinical findings is difficult because in vivo  
262 animal experiments have not measured field intensities and estimates suggest that they are ten-fold  
263 compared to humans<sup>28</sup>. To bridge the gap between human and animal work, and to increase rigor,  
264 it is important to know the actual magnitude and direction of field intensity in the target brain  
265 region. We recommend measuring the electric field in situ using sinusoidal waveforms at three  
266 different intensities. In order to calibrate the recording hardware<sup>32</sup>, we also recommend testing the  
267 stimulation and measurement systems (recording electrodes and amplifiers) in a phantom. We  
268 measured field intensity intracranially in the motor cortex and hippocampus and built a  
269 computational model to match our electrode montages. Using state-of-the-art computer models,  
270 we can now estimate the magnitude and spatial distribution of electric fields.

271 Currently available stimulation electrodes (saline filled cup or epicranial screw electrodes) cannot  
272 be combined with large-scale electrophysiology because of physical constraints<sup>47</sup>. To overcome  
273 this limitation, we developed a biocompatible permanent gel/electrode enclosure affixed to the  
274 skull and combined it with high-channel count electrophysiology and behavior in freely moving

275 rats. This conductive gel loaded chamber provided stable current delivery to the brain and  
276 prevented chemical change at the electrode-tissue interface<sup>48</sup>. In many cases this is trivial to  
277 manage but with increasing invasive electrodes, higher dose, and irregular placement of  
278 electrode/electrolyte, an extreme chemical change could in theory disintegrate the skull and  
279 damage the brain.

280 While it is clear that the efficacy of TES depends on stimulation intensity, duration, polarity, and  
281 electrode montage (size, location, and number of electrodes)<sup>49</sup>, there is no reliable evidence that  
282 higher stimulation intensity is always more effective<sup>50</sup>. The generation of action potentials have a  
283 probabilistic nature, and the TES-induced electric fields can only bias this random process. This  
284 implies that there is no strict lower threshold for field intensity to modulate the likelihood of action  
285 potential generation. However, low intensity TES will succeed only if the neuron membrane is  
286 depolarized enough to affect firing (close to its spiking threshold). Our extracellular measurements  
287 in rats showed that even very low intensity TES (~ 0.5 V/m) can have a significant effect on the  
288 activity of a handful of neurons (3-5 %). Previous studies have shown that affecting even a small  
289 number of neurons has significant behavioral effects<sup>30,31,51</sup>. We also found a dramatic increase in  
290 the number of significantly modulated neurons when the electric fields exceeded 1 V/m.

291 The present results may also speak to the long standing debate on the effects of endogenous electric  
292 fields on neuronal firing.<sup>52</sup> Electric fields generated during theta rhythms in the hippocampus of  
293 rats<sup>52</sup> can be in the range of 1-2 V/m and up to 2 V/m during slow waves in the visual cortex of  
294 ferrets<sup>6</sup>. New evidence that such weak fields can have an effect on neuronal function comes from  
295 in vitro experiments<sup>5-8</sup> as well as computational modeling.<sup>53-55</sup> These studies mostly demonstrated  
296 a modulation of the timing of rhythmic neural activity, and relied on highly coherent rhythms that  
297 are not commonly observed in vivo. The present work extends this earlier work by demonstrating  
298 effects on firing rate for fields as low as 0.5 V/m at times scales of 2 s in vivo.

299 A caveat of our study is that we only analyzed acute effects on firing rate, using only short intervals  
300 of constant current stimulation (2 s). We did not aim to document lasting effects beyond the period  
301 of stimulation, although that is the primary goal of most clinical interventions with TES. A  
302 prevalent theory for long term effects of direct current TES (tDCS) is that it affects synaptic  
303 efficacy<sup>56</sup>. There is ample in-vitro evidence that DCS can boost synaptic plasticity<sup>11,44,57-61</sup>. These  
304 effects all involve an acute boost of neuronal firing in pyramidal neurons, not unlike what was  
305 observed here. Indeed, modeling studies suggest that the observed synaptic effects are due to only  
306 a small subset of active neurons<sup>57</sup>. Effects on synaptic plasticity have been demonstrated in-vitro  
307 down to 2.5 V/m<sup>58</sup>. There is no reason why the effects observed here in vivo on firing rate at 0.5  
308 V/m would not similarly affect synaptic plasticity.

309 We recorded from the intermediate hippocampus because the orientation of pyramidal cells is  
310 parallel to the applied fields<sup>23</sup>. This ideal alignment made pyramidal cells more susceptible to  
311 electric fields. This effect was the most striking at low TES intensities. Furthermore, neurons are  
312 symmetrically located in the left and right intermediate hippocampus providing an experimental  
313 setup in which we could test cathodal and anodal effects simultaneously. Our bilateral hippocampi

314 measurements confirmed that cathodal and anodal effects are occurring simultaneously in the two  
315 hemispheres with opposing signs (cathodal TES increased, while anodal TES decreased the  
316 spiking of neurons). When stimulation electrodes are placed on the head, it is important to consider  
317 both anodal and cathodal effects.

318 Neurons are embedded in networks that are influenced by TES differently. The effect of electrical  
319 stimulation is non-specific affecting any neuronal soma, and depending primarily on cell  
320 morphology relative to local field orientation.<sup>46</sup> The symmetric morphology of inter-neuron  
321 suggests that their soma are not meaningfully polarized by electric fields. That they responded  
322 here similarly to pyramidal neurons is likely the result of monosynaptic drive from excitatory  
323 neurons, as we demonstrated with targeted optogenetic stimulation of pyramidal neurons.  
324 However, the spike rate increase in interneurons did not always correspond to the spike rate of  
325 monosynaptically connected pyramidal cells in the hippocampus. Indeed, pyramidal neurons on  
326 opposite hemispheres were positively affected, as expected given their cytoarchitecture. Therefore,  
327 the connectivity of individual inter-neurons may be the primary driver of how they respond to  
328 TES. A small subset of pyramidal neurons also responded opposite to other pyramidal neurons in  
329 their immediate neighborhood. As CA2 is curved it is possible that these pyramidal neurons were  
330 not aligned with the field orientation and thus their soma were minimally polarized, so that  
331 activated interneurons inhibited their firing. These findings suggest that effects on individual  
332 neurons are governed by the orientation and shape of the neuron relative to the electric field, as  
333 well as their connectivity to the network of neurons.

334 In conclusion, we have shown that neuronal firing rates are acutely affected in vivo at clinically  
335 relevant field magnitudes providing a viable mechanistic explanation for the effects observed with  
336 TES in human experimentation. Future work will need to establish whether these acute effects  
337 translate into long term effects, for instance, by modulating synaptic plasticity.

## 338 **Methods**

### 339 **Characterization of recording and stimulation system using agar phantom**

340 Brain phantom was constructed using a 26.7 mm diameter spherical container (30 ml syringe). To  
341 provide T1 and T2 relaxation comparable to gray matter, we followed the recipe by Schneiders et  
342 al.<sup>34</sup>. A 10 mM Nickel Chloride mixture was prepared: 2.377 grams [Ni(Cl<sub>2</sub>).6H<sub>2</sub>O] per 1 L H<sub>2</sub>O  
343 \* 2.377 grams of Nickel Chloride in one liter of distilled water. The agar mixture was prepared as:  
344 3600 ml H<sub>2</sub>O, 400 ml 10 mM Ni(Cl<sub>2</sub>), 120 grams Agar, 20 grams NaCl (0.5%) and 1 gram of  
345 Sodium Azide. The mixture was heated until boiling until the agar was completely dissolved. The  
346 boiling liquid was poured into the phantom using a funnel. All air bubbles were removed by  
347 creating a vacuum in the syringe. The phantom was let cool down and a 30-mm cylinder was cut  
348 for in vitro calibration of recording and stimulation devices (**Suppl. Fig. 1a**).

349 High-pass filtering is inherent in the design of extracellular electrophysiology amplifiers, with  
350 bandwidths ranging from 0.1 to 10 kHz<sup>33</sup>. To confirm the accuracy of our recording system (RHD  
351 USB Interface Board, Intan Technologies) and determine if any signal distortion is introduced, we  
352 applied stimulation at different frequencies (1, 10, 100 and 1000 Hz) and at different intensities  
353 (100, 150 and 200  $\mu$ A, **Suppl. Fig. 1a**) to an agar phantom<sup>34,35</sup>. The phantom was a homogeneous  
354 cylinder of 20 mm in height and 26.7 mm in diameter that was filled with agar with conductivity  
355  $\sigma = 0.9$  S/m (**Suppl. Fig. 1b**). Stimulation was delivered using platinum electrodes (2.2 by 1.6  
356 mm) positioned at a separation of 17.81 mm using an isolated stimulus generator (STG 4002,  
357 Multichannel Systems). For the measurement of the voltage values generated during stimulation  
358 within the phantom, we used two custom-built tungsten electrodes (two recording channels each  
359 electrode,  $56.3 \pm 19.8$  kOhm impedance at 1 kHz, mean  $\pm$  SD, **Suppl. Fig. 1b, c and Suppl. Fig.**  
360 **2 and Suppl. Video 1**). The tungsten electrodes were attached to a microdrive<sup>36</sup> and positioned 3.4  
361 mm apart using a stereotactic frame (Model 962, David Kopf Instruments, **Suppl. Fig. 1b and d**).  
362 The magnitude of the electric field increased linearly with stimulation intensities as expected (100,  
363 150 and 200  $\mu$ A, **Suppl. Fig. 1e**). However, the slope of the electric field decreased during 1 Hz  
364 stimulation (**Suppl. Fig. 1e**) reflecting signal attenuation caused by the built-in 0.7 Hz high-pass  
365 filter in the recording system.

### 366 **Preparing tungsten recording device**

367 A 26-gauge needle was cut to 3 mm. 50- $\mu$ m tungsten wires (Tungsten 99.95%, 100211, insulated  
368 with Heavy Polyimide, HML – Green, California Fine Wire, CA) were cut to 30 mm and the  
369 insulation (green coating) was removed from one end using a razor blade. Two tungsten wires  
370 were inserted into the stainless-steel tube (2-channel shank). Wires were positioned 5 mm from  
371 the end of the tube. Wires were separated (ch-1 and ch-2) 1 mm apart from each other (**Suppl. Fig.**  
372 **3**). Ultra-liquid superglue (Loctite 1647358, Henkel, Germany) was applied on both ends of the  
373 tube and between wires. Two, 2-channel, single shank devices were attached to a mechanical  
374 shuttle (microdrive<sup>36</sup>) or a 2 by 4 mm printed circuit board) making a 4-channel, 2-shank device.  
375 For the motor cortex recording wires were bent 90 degrees. Tungsten wires and a ground wire

376 were soldered inside a header pin (575-8514305010, Mouser, TX). The header pin connector to  
377 Omnetics adapter was soldered to connect tungsten wires to preamplifier headstage (#C3324, Intan  
378 Technologies Inc., CA). Impedance of the wires were measured by RHD USB interface board  
379 from Intan (Intan Technologies LLC, CA, USA). The device was lowered into 0.9% saline and  
380 connected to the recording preamplifier ground (RHD 32-channel recording headstages).  
381 Impedance measurement was performed at 1 kHz frequency.

## 382 **Experiments on rats**

383 All experiments were approved by the Institutional Animal Care and Use Committee at New York  
384 University Medical Center and CUNY IACUC. Rats (adult male  $n = 6$  and female  $n = 1$ , 300–400  
385 g) were kept in a vivarium on a 12-hour light/dark cycle and were housed two per cage before  
386 surgery. Rats were implanted with custom-made recording and stimulating electrodes under  
387 urethane anesthesia (1.3–1.5 g/kg, intraperitoneal injection). Atropine (0.05 mg kg<sup>-1</sup>, s.c.) was  
388 administered after anesthesia induction to reduce saliva production. The body temperature was  
389 monitored and kept constant at 36–37 °C with a DC temperature controller (TCAT-LV; Physitemp,  
390 Clifton, NJ, USA). Stages of anesthesia were maintained by confirming the lack of a nociceptive  
391 reflex.

## 392 **Recording electric fields in motor cortex of anesthetized rats**

393 The chest wall and the head were shaved. We made an incision on the head and on the chest wall.  
394 A 10 by 10 mm platinum mesh electrode (Goodfellow, PT00-MS-000110) was sutured to the  
395 pectoral muscle and an insulated cable was tunneled to the top of the head of the animal<sup>19</sup>. The  
396 skull was cleaned by hydrogen peroxide (2%) and a stimulation pocket was attached to the skull  
397 using dental cement (1.5 mm anterior to bregma and 3 mm lateral to midline). The pocket was  
398 filled with conductive gel (Signagel Electrode Gel) and a 3 by 3 mm platinum stimulation electrode  
399 was inserted inside. A craniotomy was performed on the temporal bone (1.44 mm anterior from  
400 bregma and 3 mm deep from the top of the skull) and the dura was removed. The tungsten device  
401 was inserted to the target depth (2.4 mm from the surface of the brain). The collected data was  
402 digitized at 20 kS/s using an RHD2000 recording system (Intan Technologies, Los Angeles, CA).  
403 Stimulation was delivered by Caputron LCI 1107 High Precision. Varying frequencies (10, 100  
404 and 1000 Hz) at varying intensities (10, 20 and 40  $\mu$ A) were delivered through the stimulating  
405 electrodes. Electric field was measured by fitting a sinusoid to the recorded voltage differences  
406 between the 4 contacts, averaging amplitudes of the two parallel measures, and dividing by the  
407 electrode distance (1 mm). This results in a 2D field vector, with magnitude given by the norm of  
408 this vector.

## 409 **Recording electric fields in hippocampus of anesthetized and freely moving rats**

410 The skin of the head was shaved. After a midline incision the surface of the skull was cleaned by  
411 hydrogen peroxide (2%). A custom stimulation pocket was attached to the skull using dental  
412 cement (4.8 mm posterior from bregma). The pocket was filled with conductive gel (SuperVisc,

413 EasyCap GmbH, Germany) and a 2 by 2 mm platinum stimulation electrode (#349356-600MG,  
414 Sigma-Aldrich, Inc., St. Louis, MO) was inserted inside. A stainless-steel ground screw was placed  
415 above the cerebellum (#90910A380, McMaster-Carr, Elmhurst, IL). A craniotomy was performed  
416 (4.8 mm posterior from Bregma and 5 mm lateral to midline) and the dura was removed. The  
417 silicon probe was attached to a microdrive<sup>36</sup> (128-5, Diagnostic Biochips Inc., Glen Burnie, MD  
418 or Neuropixels 2.0) and it was inserted to the target depth (4 and 6 mm from the surface of the  
419 brain). We constantly monitored the electrophysiological signal during insertion. The collected  
420 data (128-5 probe) was digitized at 20 kS/s using an RHD2000 recording system (Intan  
421 Technologies, Los Angeles, CA). Neuropixels2.0 data was digitized at 30 kS/s and a custom PXIe  
422 (Peripheral Component Interconnect (PCI) eXtension for Instrumentation; a standardized modular  
423 electronic instrumentation platform) data acquisition card was connected to a computer via a PXI  
424 chassis (NI 1071, National Instruments, Austin, TX), and OpenEphys software was used to write  
425 the data to disk<sup>43,62</sup>. Baseline session (one hour before TES) and electrical stimulation session were  
426 recorded in the homecage of rats during the sleep cycle of the animals. Stimulation was delivered  
427 by an STG4002–16mA (Multi Channel Systems, Reutlingen) using different intensities and  
428 polarities (**Suppl. Table 1**). Rats did not show any behavioral response to stimulation. To measure  
429 the electric fields in the hippocampus, varying frequencies (10, 100 and 1000 Hz) at varying  
430 intensities (10, 20 and 40  $\mu$ A) were delivered through the stimulating electrodes at the end of the  
431 recording session. TES induced voltage changes were measured shank-by-shank ( $4 \times 384 = 1536$   
432 recording sites in total). Electric field was measured by fitting a sinusoid to the recorded voltage  
433 at each recording site. We first calculated the average peak-to-peak voltage on each site ( $n = 500$   
434 trials), and then calculated the first spatial derivative of these voltage values across shanks. An  
435 average hippocampal electric field was calculated after localizing the cellular layer of the  
436 hippocampus using electrophysiological markers (Fig. 3,  $n = \pm 32$  channels were averaged around the  
437 center of the pyramidal layer).

### 438 **Local Field Potential Analysis**

439 To detect sharp wave ripples a single electrode in the middle of the pyramidal layer was selected.  
440 The wide-band LFP signal was band-pass filtered (difference-of-Gaussians; zero-lag, linear phase  
441 FIR), and instantaneous power was computed by clipping at 5 SD, rectified and low-pass filtered.  
442 The low-pass filter cut-off was at 55 Hz, and the band-pass filter was from 80 to 200 Hz.  
443 Subsequently, the power of the non-clipped signal was computed, and all events exceeding 5 SD  
444 from the mean were detected. Events were then expanded until the (non-clipped) power fell below  
445 2 SD; short events ( $<15$  ms) were discarded. The pyramidal layer of the CA1 region was identified  
446 physiologically by increased unit activity and characteristic LFP patterns.

### 447 **Single unit analysis**

448 A concatenated signal file was prepared by merging all recordings from a single animal from a  
449 single day. To improve the efficacy of spike sorting, stimulation induced onset and offset artefacts  
450 were removed before automatic spike sorting (10 ms before and 100 ms after the detected artefacts,

451 linear interpolation between timestamps). Putative single units were first sorted using Kilosort<sup>63</sup>  
452 and then manually curated using Phy (<https://phy-contrib.readthedocs.io/>). After extracting  
453 timestamps of each putative single unit activity, peristimulus time histograms and firing rate gains  
454 were analyzed using a custom MATLAB (Mathworks, Natick, MA) script. Changes in firing rate  
455 of single units ( $\Delta F$ ) were calculated by the following equation:

$$456 \quad \Delta F = 100 * \frac{\underline{S} - \underline{N}}{\max(S, N)},$$

457 Where  $\underline{S}$  and  $\underline{N}$ , are the mean firing rates for the stimulation (S) and no stimulation (N) epochs.  
458 Cells were classified into three putative cell types: narrow interneurons, wide interneurons, and  
459 pyramidal cells based on waveform metric<sup>42</sup>.

## 460 **Cell Type Classification**

461 In the processing pipeline, cells were classified into two putative cell types: interneurons, and  
462 pyramidal cells. Interneurons were selected by two separate criteria. We labeled single units as  
463 interneurons if their waveform trough-to-peak latency was <0.425 ms, or if the waveform trough-  
464 to-peak latency was >0.425 ms and the rise time of the autocorrelation histogram was >6 ms. The  
465 remaining cells were assigned as pyramidal cells. Autocorrelation histograms were fitted with a  
466 triple exponential equation to supplement the classical, waveform feature based single unit  
467 classification (<https://cellexplorer.org/pipeline/cell-type-classification/>)<sup>42</sup>. Bursts were defined as  
468 groups of spikes with interspike intervals < 9 ms. The authors had isolated 762 putative single  
469 units from seven animals in nine sessions (n = 453 putative pyramidal cells, n = 193 putative  
470 interneurons).

## 471 **Detection of Monosynaptic Cell Pairs**

472 Cross-correlation (CCG) analysis has been applied to detect putative monosynaptic  
473 connections<sup>64,65</sup>. CCG was calculated as the time resolved distribution of spike transmission  
474 probability between a reference spike train and a temporally shifting target spike train. A window  
475 interval of [-5, +5] ms with a 1-ms bin size was used for detecting sharp peaks or troughs, as  
476 identifiers of putative monosynaptic connections. Significantly correlated cell pairs were identified  
477 using a previously ground-truth validated convolution method<sup>64</sup>. The reference cell of a pair was  
478 considered to have an excitatory monosynaptic connection with the referred neuron, if any of its  
479 CCG bins within a window of 0.5–3 ms reached above confidence intervals.

## 480 **Modeling of current-induced fields**

481 Magnetic resonance imaging (MRI) scan of a template rat head was segmented into nine tissue  
482 masks namely scalp, skull, cerebrospinal fluid (csf), gray matter, white matter, cerebellum,  
483 hippocampus, thalamus, and air to develop a high resolution (0.1 mm) MRI derived volume  
484 conductor model in Simpleware (Synopsys Inc., CA, USA) using both automatic and manual  
485 filters. Computer aided model (CAD) geometry of the electrodes were modeled in SolidWorks  
486 (Dassault Systemes Corp., MA, USA) and positioned based on coordinates value from the

487 experiment. Specifically, we modeled two montages to predict the electric field in the motor cortex  
488 (montage 1) and hippocampus (montage 2). In montage 1, Platinum electrode (anode: 3 x 3 x 0.1  
489 mm<sup>3</sup>) was positioned above the primary motor cortex over the exposed skull by smearing a thin  
490 layer of conductive electrode gel, whereas the return electrode (Platinum mesh) was placed inside  
491 the chest wall (cathode: 10 x 10 x 1 mm<sup>3</sup>). In montage 2, a Platinum electrode (anode: 2 x 2 x 0.1  
492 mm<sup>3</sup>) was immersed into a conductive electrode gel and secured over the temporal bone by a  
493 plastic electrode holder on each hemisphere of the rodent head.

494 An adaptive tetrahedral mesh of rat model resulting from multiple mesh refinements was generated  
495 using a voxel-based meshing algorithm and contained > 8 M tetrahedral elements and was solved  
496 for > 10 million degrees of freedom. Volumetric meshes were later imported into COMSOL  
497 Multiphysics 4.3 (COMSOL Inc., MA, USA) to solve the model computationally using a steady-  
498 state assumption (Laplace equation,  $\nabla(\sigma\nabla V) = 0$ , where  $V$  = potential and  $\sigma$  = conductivity<sup>37</sup>).  
499 Compartment-specific assigned electrical conductivities were given as, scalp: 0.465 S/m; skull:  
500 0.01 S/m; csf: 1.65 S/m; air: 1x10<sup>-15</sup>; gray matter: 0.276 S/m; cerebellum: 0.276 S/m;  
501 hippocampus: 0.126 S/m; white matter: 0.126 S/m; thalamus: 0.276 S/m, electrode: 5.99 x 10<sup>7</sup>  
502 S/m, conductive gel: 4.5 S/m, and plastic electrode holder 1x10<sup>-15</sup> S/m. All values were based on  
503 prior literature<sup>66,66</sup>. The boundary conditions were applied as current (Montage 1: 150  $\mu$ A and  
504 Montage 2: 80  $\mu$ A) at the exposed surface of the anode while the contralateral electrode was  
505 grounded (cathode). All remaining outer boundaries of both models were electrically insulated.  
506 Electric field at the primary motor cortex and hippocampus, mimicking experimental recording  
507 sites, was predicted and peak value was reported.

## 508 **Statistical Analysis**

509 Statistical analyses were performed with MATLAB functions or custom-made scripts. The unit of  
510 analysis was typically identified as single neurons. In a few cases, the unit of analysis was sessions  
511 or animals, and this is stated in the text. Unless otherwise noted, non-parametric two-tailed  
512 Wilcoxon rank-sum (equivalent to Mann-Whitney U-test) or Wilcoxon signed-rank test was used.  
513 On box plots, the central mark indicates the median, bottom and top edges of the box indicate the  
514 25th and 75th percentiles, respectively, and whiskers extend to the most extreme data points not  
515 considered outliers. Outliers are not displayed in some plots but were included in statistical  
516 analysis. Due to experimental design constraints, the experimenter was not blind to the  
517 manipulation performed during the experiment (transcranial electrical stimulation manipulation).

## 518 **Data availability**

519 The data sets generated and analyzed during the current study are available upon reasonable  
520 request from the corresponding authors for further analyses.

## 521 **Acknowledgements**

522 We thank Gyorgy Buzsaki for useful comments on the manuscript. This work was supported by  
523 NIH through grant R01 NS130484.



524 **Author contributions:** FF, MV performed surgeries, collected, and analyzed data, NK  
525 performed current flow simulations. FF, NK, LCP, MB and MV wrote the manuscript.

526 **Competing interests:** LP is listed as inventor in patents owned by CCNY, and has shares in  
527 Soterix Medical Inc. The City University of New York (CUNY) has IP on neuro-stimulation  
528 systems and methods with authors NK and MB as inventors. NK is an employee of Synchron Inc  
529 and consults for Ceragem Medical. MB has equity in Soterix Medical. MB consults, received  
530 grants, assigned inventions, and/or served on the S A B of SafeToddles, Boston Scientific,  
531 GlaxoSmithKline, Biovisics, Mecta, Lumenis, Halo Neuroscience, Google-X, i-Lumen, Humm,  
532 Allergan (Abbvie), Apple, Ybrain, Ceragem Medical, Remz.

533

534 **References**

- 535 1. Creutzfeldt, O. D., Fromm, G. H. & Kapp, H. Influence of transcortical d-c currents on  
536 cortical neuronal activity. *Exp. Neurol.* **5**, 436–452 (1962).
- 537 2. Bindman, L. J., Lippold, O. C. & Redfearn, J. W. The action of brief polarizing current on  
538 the cerebral cortex of the rat (1) during current flow and (2) in the production of long-  
539 lasting after-effects. *J. Physiol.* **172**, 369–382 (1964).
- 540 3. Purpura, D. P. & Mcmurtry, J. G. Intracellular activities and evoked potential changes  
541 during polarization of motor cortex. *J. Neurophysiol.* **28**, 166–185 (1965).
- 542 4. Bikson, M. *et al.* Effects of uniform extracellular DC electric fields on excitability in rat  
543 hippocampal slices in vitro. *J. Physiol.* **557**, 175–190 (2004).
- 544 5. Radman, T., Su, Y., An, J. H., Parra, L. C. & Bikson, M. Spike timing amplifies the effect  
545 of electric fields on neurons: implications for endogenous field effects. *J. Neurosci. Off. J.*  
546 *Soc. Neurosci.* **27**, 3030–3036 (2007).
- 547 6. Fröhlich, F. & McCormick, D. A. Endogenous electric fields may guide neocortical  
548 network activity. *Neuron* **67**, 129–143 (2010).
- 549 7. Deans, J. K., Powell, A. D. & Jefferys, J. G. R. Sensitivity of coherent oscillations in rat  
550 hippocampus to AC electric fields. *J. Physiol.* **583**, 555–565 (2007).
- 551 8. Reato, D., Rahman, A., Bikson, M. & Parra, L. C. Low-intensity electrical stimulation  
552 affects network dynamics by modulating population rate and spike timing. *J. Neurosci. Off.*  
553 *J. Soc. Neurosci.* **30**, 15067–15079 (2010).
- 554 9. Bikson, M., Dmochowski, J. & Rahman, A. The ‘quasi-uniform’ assumption in animal and  
555 computational models of non-invasive electrical stimulation. *Brain Stimulat.* **6**, 704–705  
556 (2013).
- 557 10. Reato, D., Bikson, M. & Parra, L. C. Lasting modulation of in vitro oscillatory activity with  
558 weak direct current stimulation. *J. Neurophysiol.* **113**, 1334–1341 (2015).
- 559 11. Farahani, F., Kronberg, G., FallahRad, M., Oviedo, H. V. & Parra, L. C. Effects of direct  
560 current stimulation on synaptic plasticity in a single neuron. *Brain Stimulat.* **14**, 588–597  
561 (2021).
- 562 12. Ozen, S. *et al.* Transcranial electric stimulation entrains cortical neuronal populations in  
563 rats. *J. Neurosci. Off. J. Soc. Neurosci.* **30**, 11476–11485 (2010).
- 564 13. Binder, S. *et al.* Transcranial slow oscillation stimulation during sleep enhances memory  
565 consolidation in rats. *Brain Stimulat.* **7**, 508–515 (2014).
- 566 14. Rohan, J. G., Carhuatanta, K. A., McInturf, S. M., Miklasevich, M. K. & Jankord, R.  
567 Modulating Hippocampal Plasticity with In Vivo Brain Stimulation. *J. Neurosci.* **35**,  
568 12824–12832 (2015).
- 569 15. Vöröslakos, M. *et al.* Direct effects of transcranial electric stimulation on brain circuits in  
570 rats and humans. *Nat. Commun.* **9**, 483 (2018).
- 571 16. Mishima, T. *et al.* Transcranial direct current stimulation (tDCS) induces adrenergic  
572 receptor-dependent microglial morphological changes in mice. *eNeuro* ENEURO.0204-

- 573 19.2019 (2019) doi:10.1523/ENEURO.0204-19.2019.
- 574 17. Gellner, A.-K., Reis, J., Holtick, C., Schubert, C. & Fritsch, B. Direct current stimulation-  
575 induced synaptic plasticity in the sensorimotor cortex: structure follows function. *Brain*  
576 *Stimulat.* **13**, 80–88 (2020).
- 577 18. Huang, W. A. *et al.* Transcranial alternating current stimulation entrains alpha oscillations  
578 by preferential phase synchronization of fast-spiking cortical neurons to stimulation  
579 waveform. *Nat. Commun.* **12**, 3151 (2021).
- 580 19. Fritsch, B., Gellner, A.-K. & Reis, J. Transcranial Electrical Brain Stimulation in Alert  
581 Rodents. *J. Vis. Exp. JoVE* 56242 (2017) doi:10.3791/56242.
- 582 20. Podda, M. V. *et al.* Anodal transcranial direct current stimulation boosts synaptic plasticity  
583 and memory in mice via epigenetic regulation of Bdnf expression. *Sci. Rep.* **6**, 22180  
584 (2016).
- 585 21. Márquez-Ruiz, J. *et al.* Transcranial direct-current stimulation modulates synaptic  
586 mechanisms involved in associative learning in behaving rabbits. *Proc. Natl. Acad. Sci.*  
587 **109**, 6710–6715 (2012).
- 588 22. Johnson, L. *et al.* Dose-dependent effects of transcranial alternating current stimulation on  
589 spike timing in awake nonhuman primates. *Sci. Adv.* **6**, eaaz2747 (2020).
- 590 23. Chan, C. Y. & Nicholson, C. Modulation by applied electric fields of Purkinje and stellate  
591 cell activity in the isolated turtle cerebellum. *J. Physiol.* **371**, 89–114 (1986).
- 592 24. Asan, A. S., Gok, S. & Sahin, M. Electrical fields induced inside the rat brain with skin,  
593 skull, and dural placements of the current injection electrode. *PLOS ONE* **14**, e0203727  
594 (2019).
- 595 25. Sharma, M., Farahani, F., Bikson, M. & Parra, L. C. Animal Studies on the Mechanisms of  
596 Low-Intensity Transcranial Electric Stimulation. in *Transcranial Direct Current*  
597 *Stimulation in Neuropsychiatric Disorders* (eds. Brunoni, A. R., Nitsche, M. A. & Loo, C.  
598 K.) 67–92 (Springer International Publishing, 2021). doi:10.1007/978-3-030-76136-3\_5.
- 599 26. Opitz, A. *et al.* Spatiotemporal structure of intracranial electric fields induced by  
600 transcranial electric stimulation in humans and nonhuman primates. *Sci. Rep.* **6**, 31236  
601 (2016).
- 602 27. Huang, Y. *et al.* Measurements and models of electric fields in the in vivo human brain  
603 during transcranial electric stimulation. *eLife* **6**, e18834 (2017).
- 604 28. Liu, A. *et al.* Immediate neurophysiological effects of transcranial electrical stimulation.  
605 *Nat. Commun.* **9**, 5092 (2018).
- 606 29. Steinmetz, N. A. *et al.* Neuropixels 2.0: A miniaturized high-density probe for stable, long-  
607 term brain recordings. *Science* **372**, eabf4588 (2021).
- 608 30. Houweling, A. R. & Brecht, M. Behavioural report of single neuron stimulation in  
609 somatosensory cortex. *Nature* **451**, 65–68 (2008).
- 610 31. Huber, D. *et al.* Sparse optical microstimulation in barrel cortex drives learned behaviour in  
611 freely moving mice. *Nature* **451**, 61–64 (2008).
- 612 32. FallahRad, M. *et al.* Electrophysiology equipment for reliable study of kHz electrical

- 613 stimulation. *J. Physiol.* **597**, 2131–2137 (2019).
- 614 33. Seymour, J. P., Wu, F., Wise, K. D. & Yoon, E. State-of-the-art MEMS and microsystem  
615 tools for brain research. *Microsyst. Nanoeng.* **3**, 16066 (2017).
- 616 34. Schneiders, N. J. Solutions of two paramagnetic ions for use in nuclear magnetic resonance  
617 phantoms. *Med. Phys.* **15**, 12–16 (1988).
- 618 35. Christoffersson, J. O., Olsson, L. E. & Sjöberg, S. Nickel-doped agarose gel phantoms in  
619 MR imaging. *Acta Radiol. Stockh. Swed. 1987* **32**, 426–431 (1991).
- 620 36. Vöröslakos, M., Petersen, P. C., Vöröslakos, B. & Buzsáki, G. Metal microdrive and head  
621 cap system for silicon probe recovery in freely moving rodent. *eLife* **10**, e65859 (2021).
- 622 37. Bikson, M. *et al.* Modeling sequence and quasi-uniform assumption in computational  
623 neurostimulation. *Prog. Brain Res.* **222**, 1–23 (2015).
- 624 38. Jiang, J. *et al.* Enhanced tES and tDCS computational models by meninges emulation. *J.*  
625 *Neural Eng.* **17**, 016027 (2020).
- 626 39. Datta, A. *et al.* Gyri-precise head model of transcranial direct current stimulation: improved  
627 spatial focality using a ring electrode versus conventional rectangular pad. *Brain Stimulat.*  
628 **2**, 201–207, 207.e1 (2009).
- 629 40. Miranda, P. C., Hallett, M. & Basser, P. J. The electric field induced in the brain by  
630 magnetic stimulation: a 3-D finite-element analysis of the effect of tissue heterogeneity and  
631 anisotropy. *IEEE Trans. Biomed. Eng.* **50**, 1074–1085 (2003).
- 632 41. Csicsvari, J. *et al.* Massively parallel recording of unit and local field potentials with  
633 silicon-based electrodes. *J. Neurophysiol.* **90**, 1314–1323 (2003).
- 634 42. Petersen, P. C., Siegle, J. H., Steinmetz, N. A., Mahallati, S. & Buzsáki, G. CellExplorer: A  
635 framework for visualizing and characterizing single neurons. *Neuron* **109**, 3594–3608.e2  
636 (2021).
- 637 43. Jun, J. J. *et al.* Fully integrated silicon probes for high-density recording of neural activity.  
638 *Nature* **551**, 232–236 (2017).
- 639 44. Rahman, A., Lafon, B., Parra, L. C. & Bikson, M. Direct current stimulation boosts  
640 synaptic gain and cooperativity in vitro. *J. Physiol.* **595**, 3535–3547 (2017).
- 641 45. Vöröslakos, M. *et al.* HectoSTAR  $\mu$ LED Optoelectrodes for Large-Scale, High-Precision  
642 In Vivo Opto-Electrophysiology. *Adv. Sci.* **9**, e2105414 (2022).
- 643 46. Radman, T., Ramos, R. L., Brumberg, J. C. & Bikson, M. Role of cortical cell type and  
644 morphology in subthreshold and suprathreshold uniform electric field stimulation in vitro.  
645 *Brain Stimulat.* **2**, 215–228, 228.e1–3 (2009).
- 646 47. Jackson, M. P. *et al.* Animal models of transcranial direct current stimulation: Methods and  
647 mechanisms. *Clin. Neurophysiol. Off. J. Int. Fed. Clin. Neurophysiol.* **127**, 3425–3454  
648 (2016).
- 649 48. Merrill, D. R., Bikson, M. & Jefferys, J. G. R. Electrical stimulation of excitable tissue:  
650 design of efficacious and safe protocols. *J. Neurosci. Methods* **141**, 171–198 (2005).
- 651 49. Peterchev, A. V. *et al.* Fundamentals of transcranial electric and magnetic stimulation dose:

- 652 definition, selection, and reporting practices. *Brain Stimulat.* **5**, 435–453 (2012).
- 653 50. Esmaeilpour, Z. *et al.* Incomplete evidence that increasing current intensity of tDCS boosts  
654 outcomes. *Brain Stimulat.* **11**, 310–321 (2018).
- 655 51. Ledford, H. The power of a single neuron. *Nature news*. 2007.392 (2007).
- 656 52. Jefferys, J. G. Nonsynaptic modulation of neuronal activity in the brain: electric currents  
657 and extracellular ions. *Physiol. Rev.* **75**, 689–723 (1995).
- 658 53. Qiu, C., Shivacharan, R. S., Zhang, M. & Durand, D. M. Can Neural Activity Propagate by  
659 Endogenous Electrical Field? *J. Neurosci.* **35**, 15800–15811 (2015).
- 660 54. Anastassiou, C. A. & Koch, C. Ephaptic coupling to endogenous electric field activity: why  
661 bother? *Curr. Opin. Neurobiol.* **31**, 95–103 (2015).
- 662 55. Pinotsis, D. A. & Miller, E. K. In vivo ephaptic coupling allows memory network  
663 formation. *Cereb. Cortex* **33**, 9877–9895 (2023).
- 664 56. Stagg, C. J. & Nitsche, M. A. Physiological basis of transcranial direct current stimulation.  
665 *Neurosci. Rev. J. Bringing Neurobiol. Neurol. Psychiatry* **17**, 37–53 (2011).
- 666 57. Kronberg, G., Rahman, A., Sharma, M., Bikson, M. & Parra, L. C. Direct current  
667 stimulation boosts hebbian plasticity in vitro. *Brain Stimulat.* **13**, 287–301 (2020).
- 668 58. Sharma, M., Farahani, F., Bikson, M. & Parra, L. C. Weak DCS causes a relatively strong  
669 cumulative boost of synaptic plasticity with spaced learning. *Brain Stimulat.* **15**, 57–62  
670 (2022).
- 671 59. Kronberg, G., Bridi, M., Abel, T., Bikson, M. & Parra, L. C. Direct Current Stimulation  
672 Modulates LTP and LTD: Activity Dependence and Dendritic Effects. *Brain Stimulat.* **10**,  
673 51–58 (2017).
- 674 60. Fritsch, B. *et al.* Direct current stimulation promotes BDNF-dependent synaptic plasticity:  
675 potential implications for motor learning. *Neuron* **66**, 198–204 (2010).
- 676 61. Ranieri, F. *et al.* Modulation of LTP at rat hippocampal CA3-CA1 synapses by direct  
677 current stimulation. *J. Neurophysiol.* **107**, 1868–1880 (2012).
- 678 62. Siegle, J. H. *et al.* Open Ephys: an open-source, plugin-based platform for multichannel  
679 electrophysiology. *J. Neural Eng.* **14**, 045003 (2017).
- 680 63. Pachitariu, M., Steinmetz, N., Kadir, S., Carandini, M. & Kenneth D., H. *Kilosort: realtime*  
681 *spike-sorting for extracellular electrophysiology with hundreds of channels.*  
682 <http://biorxiv.org/lookup/doi/10.1101/061481> (2016) doi:10.1101/061481.
- 683 64. English, D. F. *et al.* Pyramidal Cell-Interneuron Circuit Architecture and Dynamics in  
684 Hippocampal Networks. *Neuron* **96**, 505-520.e7 (2017).
- 685 65. Barthó, P. *et al.* Characterization of neocortical principal cells and interneurons by network  
686 interactions and extracellular features. *J. Neurophysiol.* **92**, 600–608 (2004).
- 687 66. Hadar, R. *et al.* Prevention of schizophrenia deficits via non-invasive adolescent frontal  
688 cortex stimulation in rats. *Mol. Psychiatry* **25**, 896–905 (2020).
